# Supplementary material for: Untargeted Metabolomics Approach for the Differentiation between Panax vietnamensis var. vietnamensis and Panax vietnamensis var. fuscidiscus
Source: MDPI journal article supplement (doi:10.3390/metabo13060763), 2023-06-19
Supplement: s1 [file s1]

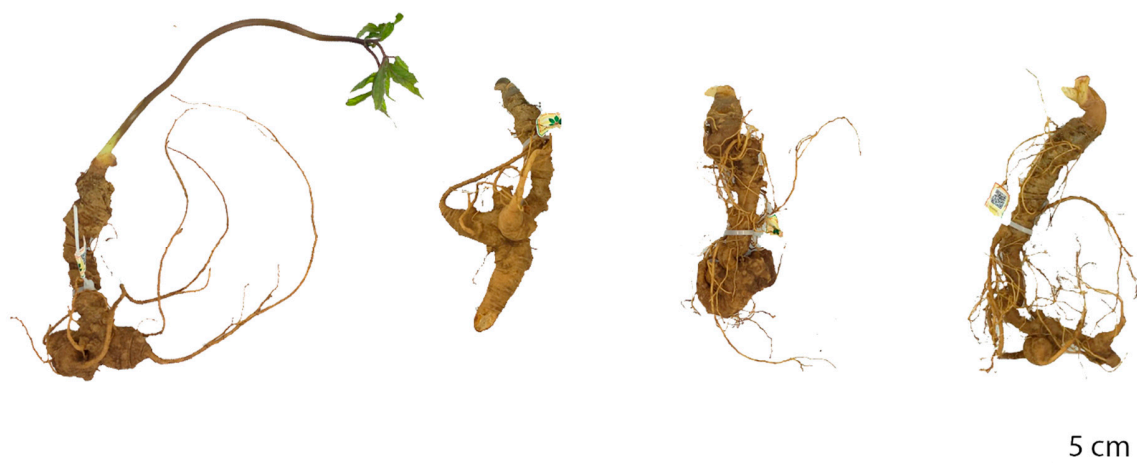

**Figure S1.** *Panax vietnamensis* roots.

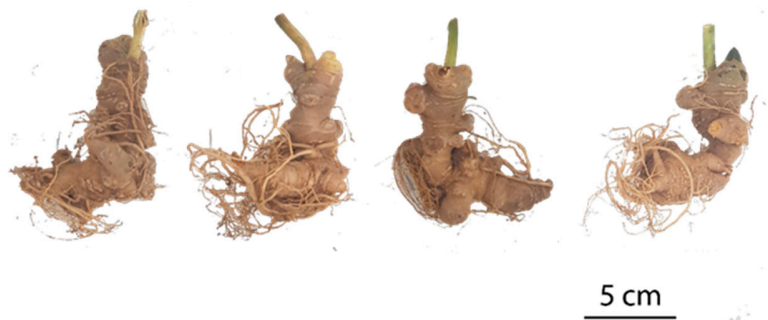

**Figure S2.** *Panax vietnamensis* var. *fuscidiscus* roots.

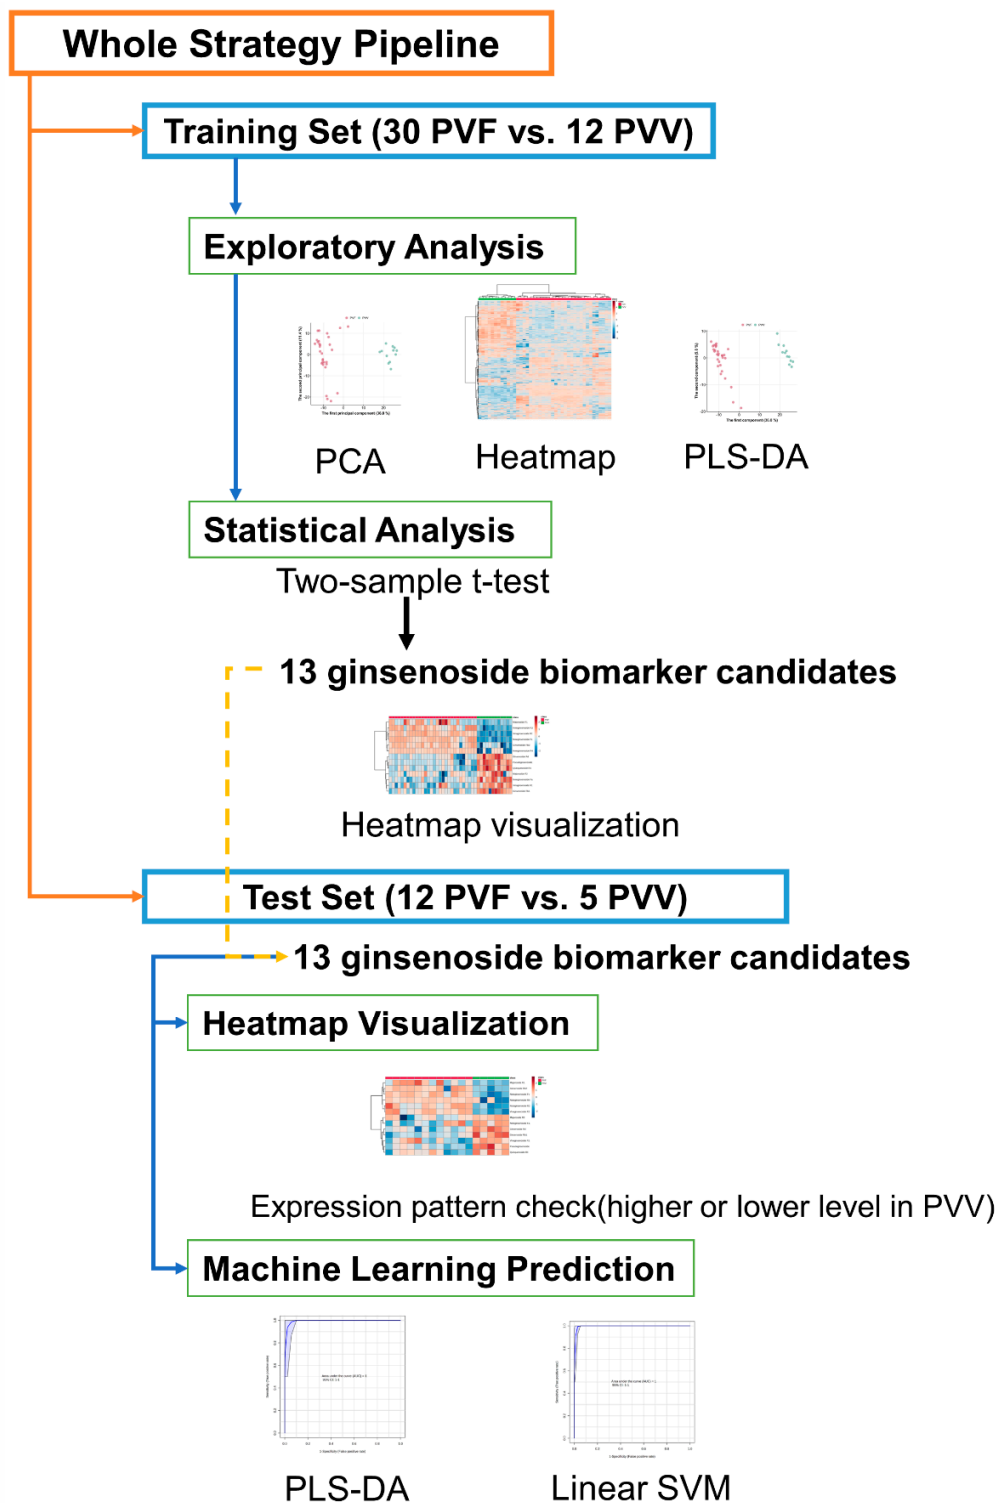

**Figure S3.** The schematic view of this study's workflow.

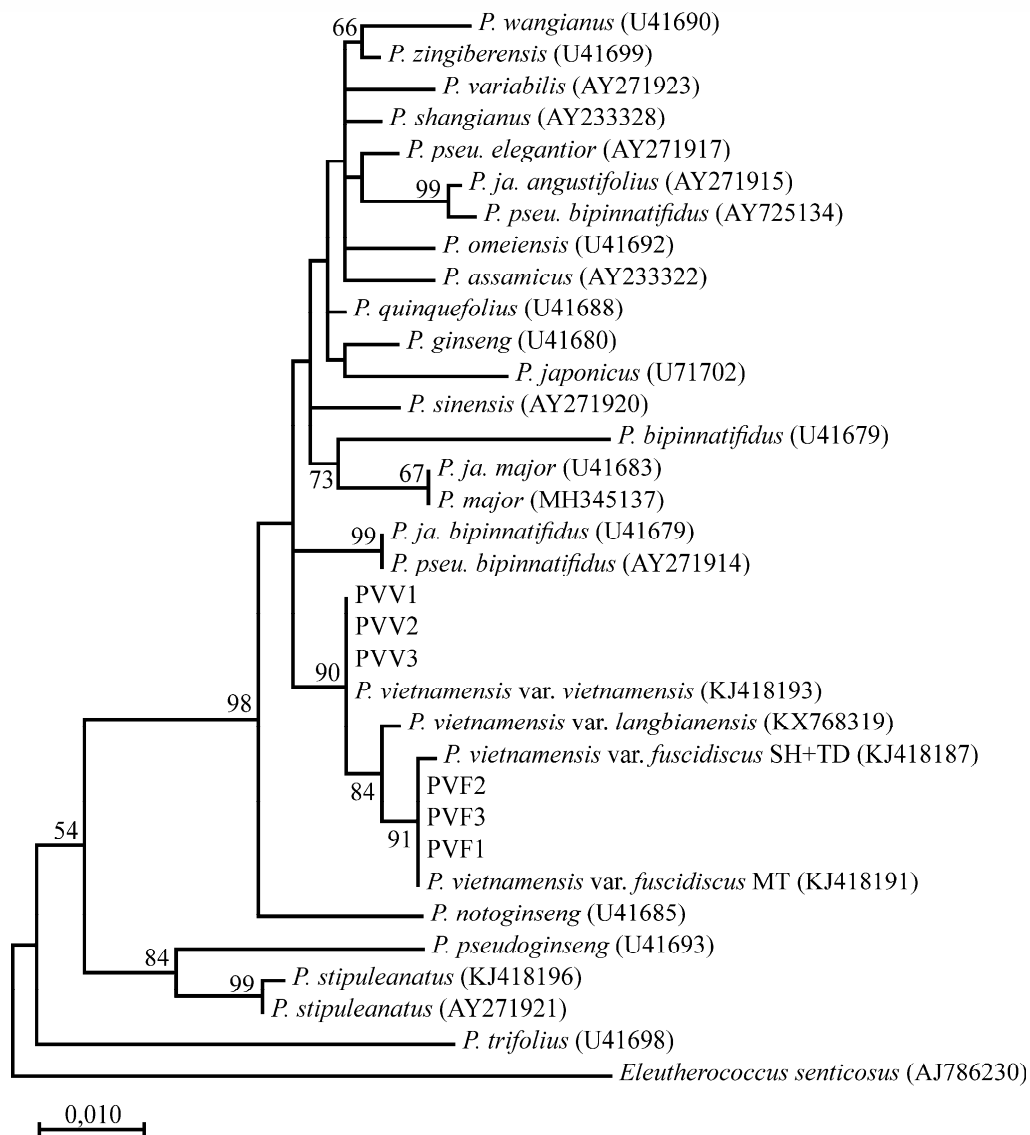

**Figure S4.** The phylogenetic relationship of the all specimens with other species in the *Panax* genus using ML method. The number in the brackets are Genbank accession number. The number in the root are bootstrap support after 500 replicates.

**Table S1.** Compounds indentified in PV and PVF

| Number | Compounds               | Rt (min) | [M-H] ( <i>m/z</i> ) | PVV | PVF | Absolute | Tentative |
|--------|-------------------------|----------|----------------------|-----|-----|----------|-----------|
| 1      | Vinaginsenoside R13     | 2.04     | 71.4366              | x   | x   |          | x         |
| 2      | Vinaginsenoside R14     | 4.59     | 801.4635             | x   | x   |          | x         |
| 3      | Vinaginsenoside R4      | 9.11     | 961.5378             | o   | x   |          | x         |
| 4      | Majonoside R1           | 10.28    | 815.4793             | x   | x   | x        |           |
| 5      | Notoginsenoside R1      | 11.26    | 931.5252             | x   | x   | x        |           |
| 6      | Ginsenoside Rg1         | 16.38    | 845.4894             | x   | x   | x        |           |
| 7      | Majonoside R2           | 17.40    | 785.4688             | x   | x   | x        |           |
| 8      | Pseudoginsenoside Rt4   | 20.15    | 653.4340             | x   | x   | x        |           |
| 9      | Vinaginsenoside R11     | 21.87    | 785.4680             | x   | x   | x        |           |
| 10     | Hemsloside Ma3          | 29.42    | 1087.5281            | o   | x   |          | x         |
| 11     | Pseudoginsenoside Rc1   | 31.61    | 987.5527             | x   | x   |          | x         |
| 12     | Vinaginsenoside R2      | 32.71    | 827.4795             | x   | x   | x        |           |
| 13     | Notoginsenoside R2      | 34.36    | 769.4752             | o   | x   |          | x         |
| 14     | Notoginsenoside R4      | 36.36    | 1239.6357            | o   | x   |          | x         |
| 15     | Notoginsenoside Fa      | 38.13    | 1239.6364            | x   | o   |          | x         |
| 16     | Ginsenoside Rb1         | 40.60    | 1107.5946            | x   | x   | x        |           |
| 17     | Quinquenoside R1        | 43.11    | 1149.6049            | x   | o   |          | x         |
| 18     | Notoginsenoside Fc      | 44.43    | 1209.6281            | o   | x   |          | x         |
| 19     | Quinquenoside R1 isomer | 45.81    | 1149.6046            | o   | x   |          | x         |
| 20     | Ginsenoside Rb2         | 46.81    | 1077.5844            | o   | x   | x        |           |
| 21     | Ginsenoside Rd          | 49.64    | 945.5427             | x   | x   | x        |           |
| 22     | Pseudoginsenoside Rs1   | 50.05    | 987.5540             | x   | x   |          | x         |
